# Supplementary material for: One-tube B7-H3 detection based on isothermal exponential amplification and dendritic hybridization chain reaction
Source: Royal Society of Chemistry journal article supplement (doi:10.1039/d3na01025b), 2024-01-01
Supplement: d3na01025b4.pdf [file d3na01025b4.pdf]

Electronic Supplementary Information

**One-tube B7-H3 detection based on isothermal exponential  
amplification and dendritic hybridization chain reaction**

Xiangyun Chen,<sup>a</sup> Chun Xuan,<sup>a</sup> Jingtao Lin,<sup>a</sup> Zhongquan Pan,<sup>a</sup> Xiaoliang Wu,<sup>a</sup> Pin Wu<sup>a</sup>  
Zhenchang Liang,<sup>\*c</sup> Luxin Yu,<sup>\*b</sup> Cailing Qiu,<sup>\*a</sup>

*a. Dalang Hospital of Dongguan, Dongguan 523770, China. E-mail:  
youling85@126.com*

*b. Guangdong Provincial Key Laboratory of Medical Molecular  
Diagnostics, The First Dongguan Affiliated Hospital, Guangdong Medical  
University, Dongguan 523808, China. E-mail: yuluxin2006@163.com.*

*c. Zhongshan City Shiqisuhuazan Hospital, Zhongshan, 528400, China.  
E-Mail: lzhchang206@sina.com.*

Fax: +86 76983009824; Tel: +86 76983009824;

E-mail: youling85@126.com, [yuluxin2006@163.com](mailto:yuluxin2006@163.com),  
lzhchang206@sina.com.

### Stability of the one-tube B7-H3 assay

The protein-to-DNA signal transducer (anti-B7-H3 antibody conjugated DNA1/DNA3 duplex) and other reaction components were stored at 4 °C for a period from 0 day to 15 days.

### Atomic force microscopy (AFM) imaging

Assembly products were diluted in 1× TAE/Mg<sup>2+</sup> buffer and deposited onto freshly cleaved mica (Ted Pella, USA) for 3 min. Samples were then rinsed with deionized water and dried at room temperature. AFM imaging experiments were performed in the air in tapping mode on a Dimension 3100 AFM (Veeco, USA). Silicon probes FS-1500AuD (Santa Barbara, CA). The image background was flattened by Nanoscope IIIa software.

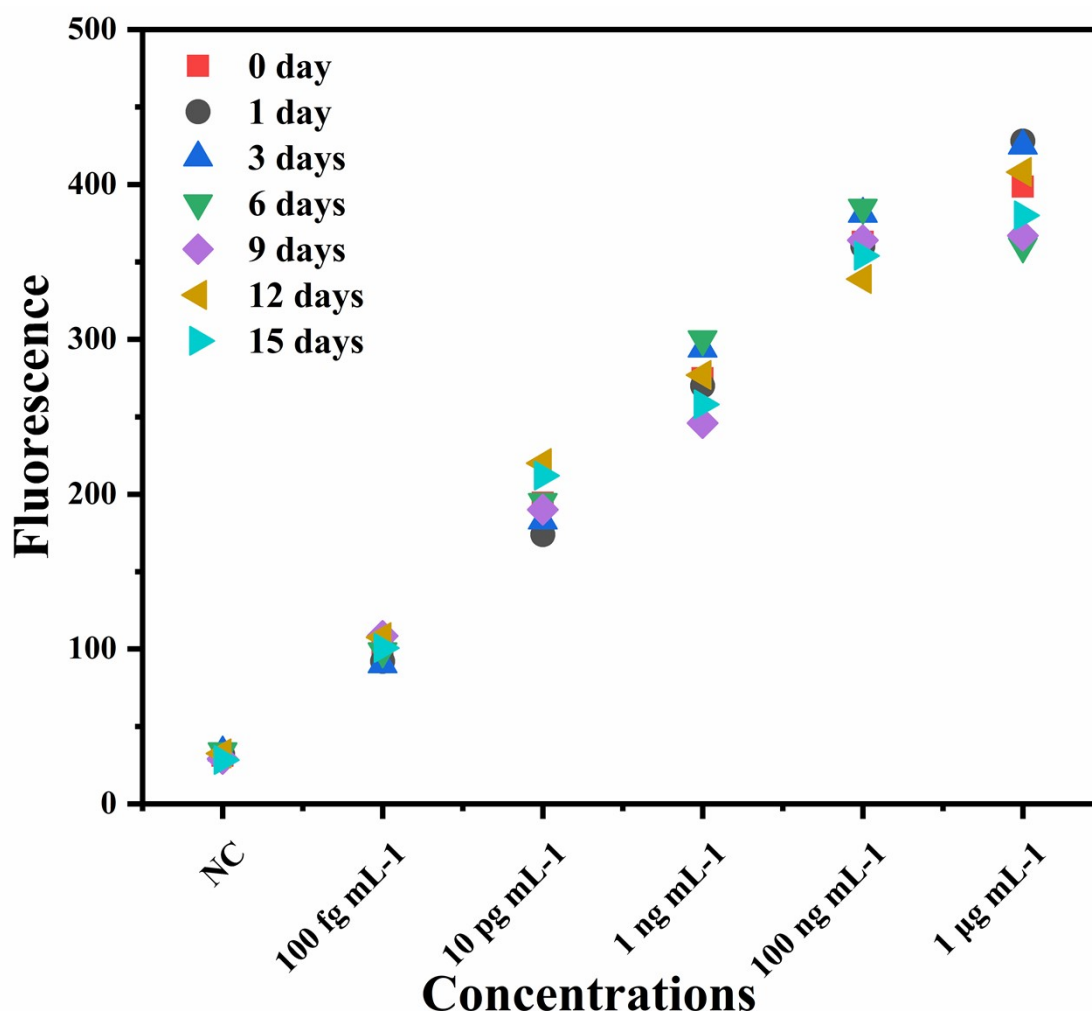

**Fig. S1** The stability of the one-tube B7-H3 assay. The fluorescence response of the construction of protein-to-DNA signal transducer at different storage periods with various concentrations of B7-H3.

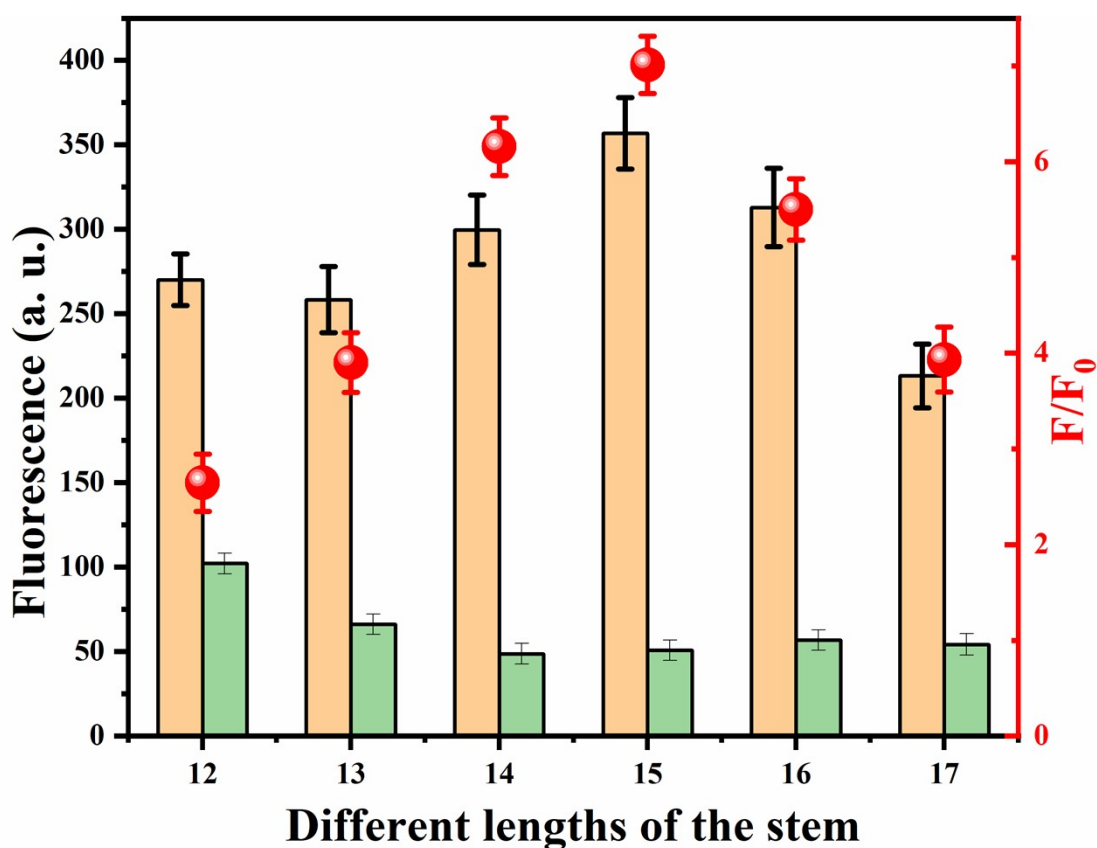

Fig. S2 Optimization of different lengths of the stem in DH2 and DH3.

Table S1 Oligonucleotide sequences of different lengths of the stem in DH2 and DH3

| Oligonucleotid | Sequences (5' to 3')                                                                                         |
|----------------|--------------------------------------------------------------------------------------------------------------|
| e              |                                                                                                              |
| D-HCR-H2-12    | TTT GAT <u>ACG GCT GTG</u> TCG ACCATG CGA CAC AGC CGT                                                        |
| D-HCR-H3-12    | CGA CAC AGC CGT ATC AAA CGA CAC AGC CGT ATC AAA <u>GCT GTG</u><br>TCG ACG GCT GTG TCG CAT GGT                |
| D-HCR-H2-13    | TTT GAT <u>ACG GCT GTG</u> TCG T ACCA TG A CGA CAC AGC CGT                                                   |
| D-HCR-H3-13    | A CGA CAC AGC CGT ATC AAA A CGA CAC AGC CGT ATC AAA <u>GCT</u><br><u>GTG</u> TCG T ACG GCT GTG TCG T CAT GGT |
| D-HCR-H2-14    | TTT GAT <u>ACG GCT GTG</u> TCG TA ACCA TG TA CGA CAC AGC CGT                                                 |
| D-HCR-H3-14    | TA CGA CAC AGC CGT ATC AAA TA CGA CAC AGC CGT ATC AAA <u>GCT</u>                                             |

GTG TCG TA ACG GCT GTG TCG TA CAT GGT

D-HCR-H2-15 TTT GAT ACG GCT GTG TCG TAG ACCA TG CTA CGA CAC AGC CGT

D-HCR-H3-15 CTA CGA CAC AGC CGT ATC AAA CTA CGA CAC AGC CGT ATC AAA

GCT GTG TCG TAG ACG GCT GTG TCG TAG CAT GGT

D-HCR-H2-16 TTT GAT ACG GCT GTG TCG TAGG ACCA TG CCTA CGA CAC AGC

CGT

D-HCR-H3-16 CCTA CGA CAC AGC CGT ATC AAA CCTA CGA CAC AGC CGT ATC AAA

GCT GTG TCG TAGG ACG GCT GTG TCG TAGG CAT GGT

D-HCR-H2-17 TTT GAT ACG GCT GTG TCG TAGGC ACCA TG GCCTA CGA CAC AGC

CGT

D-HCR-H3-17 GCCTA CGA CAC AGC CGT ATC AAA GCCTA CGA CAC AGC CGT ATC

AAA GCT GTG TCG TAGGC ACG GCT GTG TCG TAGGC CAT GGT

---

**Table S2** Comparison of our approach with other protein assays.

| Methods                  | Strategy                                                                 | LOD                      | Assay time (h) | Linear range        | Ref |
|--------------------------|--------------------------------------------------------------------------|--------------------------|----------------|---------------------|-----|
| Fluorescence             | Dropcast Single Molecule Assays                                          | 19 aM                    | 2              | -                   | 1   |
| Electrochemiluminescence | Dual-Polar Electrochemiluminescence from Au 25 Nanoclusters              | 0.43 pg mL <sup>-1</sup> | 2              | 1 pg/m L - 1 ng/m L | 2   |
| Electrochemical ELISA    | Protein Biosensing in Undiluted Serum Using a Polypyrrole-Based Platform | 78 pg mL <sup>-1</sup>   | 2              | 100 pg/m L-100 ng/m | 3   |

|                    |                                             |                          |   |              | L |   |
|--------------------|---------------------------------------------|--------------------------|---|--------------|---|---|
| Electrochemical    | peptide inhibitor-based biosensing platform | 0.03 ng mL <sup>-1</sup> | 2 |              |   | 4 |
| Lateral flow assay | protein-to-DNA transducer-based approaches  | 0.74 fM                  | 2 | 1 fM- 100 nM |   | 5 |

**Table S3** Spiking test in human serum and saliva samples.

| Sample | Spiked     | Found        | Recovery | RSD   |
|--------|------------|--------------|----------|-------|
| serum  | 100 ng /mL | 106.9 ng /mL | 106.9%   | 2.62% |
| serum  | 1 ng /mL   | 1.054 ng /mL | 105.4%   | 4.64% |
| serum  | 10 pg /mL  | 9.057pg /mL  | 90.57%   | 8.20% |
| saliva | 100 ng /mL | 89.42ng /mL  | 89.42%   | 3.32% |
| saliva | 1 ng /mL   | 1.096 ng /mL | 109.6%   | 3.25% |
| saliva | 10 pg /mL  | 11.22 pg /mL | 112.2%   | 8.28% |

All the data in the table represents the average of three measurements

- [1] C. Wu, P.M. Garden, D.R. Walt, Ultrasensitive Detection of Attomolar Protein Concentrations by Dropcast Single Molecule Assays, *Journal of the American Chemical Society*, 142 (2020) 12314-12323.
- [2] Y. Zhou, Y. Chai, R. Yuan, Highly Efficient Dual-Polar Electrochemiluminescence from Au(25) Nanoclusters: The Next Generation of Multibiomarker Detection in a Single Step, *Analytical chemistry*, 91 (2019) 14618-14623.
- [3] S.K. Arya, P. Estrela, Electrochemical ELISA Protein Biosensing in Undiluted Serum Using a Polypyrrole-Based Platform, *Sensors (Basel, Switzerland)*, 20 (2020).
- [4] V. Vanova, K. Mitrevska, V. Milosavljevic, D. Hynek, L. Richtera, V. Adam, Peptide-based electrochemical biosensors utilized for protein detection, *Biosensors & bioelectronics*, 180 (2021) 113087.
- [5] Z. Tang, W. Zhao, Y. Deng, Y. Sun, C. Qiu, B. Wu, J. Bao, Z. Chen and L. Yu, *Analyst*, 2022, **147**, 1709-1715.
