# Supplementary figures and images for: One-tube B7-H3 detection based on isothermal exponential amplification and dendritic hybridization chain reaction
Source: Royal Society of Chemistry journal article supplement (doi:10.1039/d3na01025b), 2024-01-01

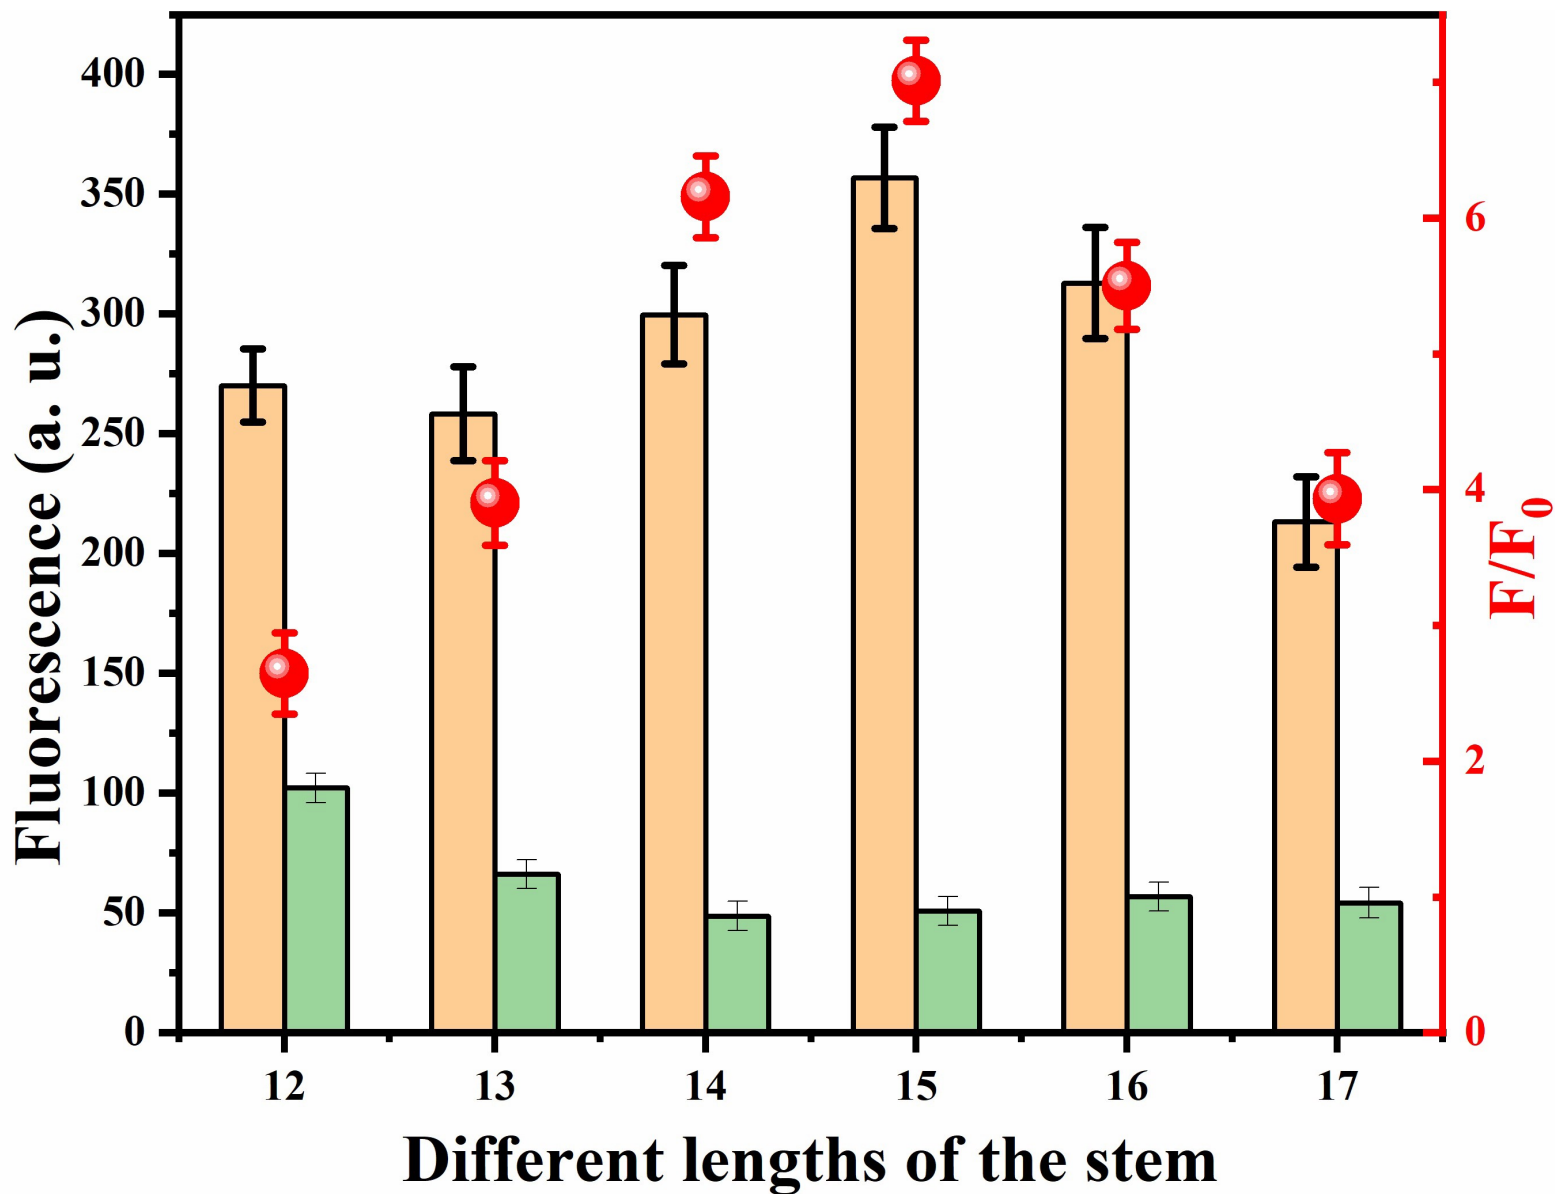

Supplement: d3na01025b3.pdf [file d3na01025b3.pdf]
